# Supplementary material for: Mechanical properties of organic–inorganic halide perovskites, CH3NH3PbX3(X = I, Br and Cl), by nanoindentation
Source: Royal Society of Chemistry journal article supplement (doi:10.1039/c5ta03331d), 2015-01-01
Supplement: c5ta03331d1.pdf [file c5ta03331d1.pdf]

## Supporting Information

### Mechanical Properties of Organic-Inorganic Halide Perovskites, $\text{CH}_3\text{NH}_3\text{PbX}_3$ (X=I, Br and Cl) by Nanoindentation

Shijing Sun,<sup>a</sup> Yanan Fang,<sup>b</sup> Gregor Kieslich,<sup>a</sup> Tim J. White<sup>\*b</sup> and Anthony K. Cheetham<sup>\*a</sup>

<sup>a</sup>Department of Materials Science & Metallurgy, University of Cambridge, 27 Charles Babbage Road, Cambridge, CB3 0FS. E-mail: akc30@cam.ac.uk

<sup>b</sup>School of Materials Science and Engineering, Nanyang Technological University, 50 Nanyang Avenue, Singapore, 639798. Email: tjwhite@ntu.edu.sg

**Table. S1** Summary of a number of representative nanoindentation experiments, variations between each measurement are due to the systematic error of the indenter and random errors from sample preparation procedures.

| Crystals                                                | Crystal System | Orientation | No. of Indents | Young's Modulus (GPa) | Std.Dev. | Hardness (GPa) | Std.Dev. |
|---------------------------------------------------------|----------------|-------------|----------------|-----------------------|----------|----------------|----------|
| <b><math>\text{CH}_3\text{NH}_3\text{PbBr}_3</math></b> |                |             |                |                       |          |                |          |
| 1                                                       | Cubic          | 010         | 20             | 17.71                 | 0.61     | 0.31           | 0.02     |
| 2                                                       | Cubic          | 011         | 11             | 15.56                 | 0.60     | 0.26           | 0.02     |
| <b><math>\text{CH}_3\text{NH}_3\text{PbCl}_3</math></b> |                |             |                |                       |          |                |          |
| 1                                                       | Cubic          | 100         | 11             | 19.77                 | 0.69     | 0.29           | 0.02     |
| 2                                                       | Cubic          | 110         | 18             | 17.66                 | 0.57     | 0.30           | 0.02     |
| <b><math>\text{CH}_3\text{NH}_3\text{PbI}_3</math></b>  |                |             |                |                       |          |                |          |
| 1                                                       | Tetragonal     | 112         | 14             | 10.74                 | 0.53     | 0.42           | 0.04     |
| 2                                                       | Tetragonal     | 100         | 14             | 10.44                 | 0.77     | 0.43           | 0.04     |

## Indexing

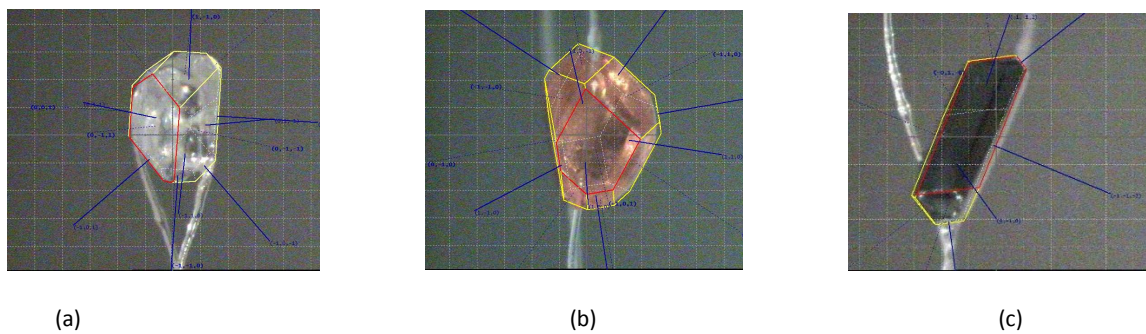

Fig.S1 Photographs of representative face-indexed single crystals, (a)  $\text{CH}_3\text{NH}_3\text{PbCl}_3$ , (b)  $\text{CH}_3\text{NH}_3\text{PbBr}_3$  and (c)  $\text{CH}_3\text{NH}_3\text{PbI}_3$ .

## Indentation Hardness

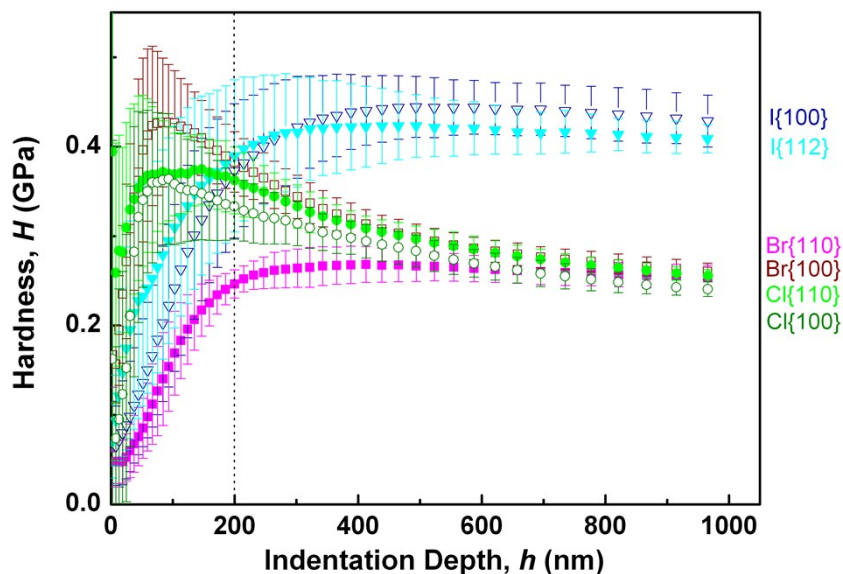

Fig. S2 Hardness as a function of the indentation depth (Each curve was obtained from one representative crystal).

## Nanoindentation Methodology

In continuous stiffness measurement (CSM) mode, where indentation is controlled by displacement, Young's modulus ( $E$ ) and hardness ( $H$ ) were measured using a three sided pyramidal sharp Berkovich tip. With a strain rate of  $0.05 \text{ s}^{-1}$ , the load,  $P$ , and the displacement,  $h$  were monitored continuously during the experiment and the indenter was held for 30 s at the maximum load before unloading at the same strain rate in order to minimize the creep effect.  $P$  was plotted as a function of indentation depth and the elastic contact stiffness,  $S$  was determined by  $dP/dh$ . The analysis of  $P$ - $h$  curves was described in the previous literature.<sup>1,2</sup> Using the standard Oliver-Pharr Method,<sup>3</sup> the reduced modulus,  $E_r$ , was obtained by:

$$E_r = \frac{\sqrt{\pi}}{2\beta} \frac{S}{\sqrt{A_c}} \quad (1)$$

Where  $A_c$  is the contact area under load based on the calibrated tip areal function and  $\beta$  is a constant that depends on the

geometry of the indenter (for a Berkovich tip  $\beta = 1.034$ ). The anisotropic elastic moduli along different crystal facets were then extracted by:

$$\frac{1}{E_r} = \frac{1-\nu_i^2}{E_i} + \frac{1-\nu_s^2}{E_s} \quad (2)$$

Where  $\nu$  and  $E$  are Poisson's ratio and elastic modulus, respectively; and the subscripts  $i$  and  $s$  refer to the indenter and test material, respectively.<sup>3</sup> In this study the measured Young's Modulus ( $E$ ) refers to  $E_s$ . The diamond indenter properties used are  $E_i = 1141$  GPa, and Poisson's ratio for the indenter is  $\nu_i = 0.07$ . In the main article, elastic moduli were calculated using the  $\nu_s = 0.3$ .

As a measure of materials' ability to resist local plastic deformation, indentation hardness ( $H$ ) is determined by:<sup>3</sup>

$$H = \frac{P_{\max}}{A_c} \quad (3)$$

Where  $P_{\max}$  is the maximum indentation load and  $A_c$  is the contact area between the indenter tip and the sample. In this case,  $A_c$  is calculated from the contact depth  $h_c$ , governed by the following equation:<sup>4</sup>

$$h_c = h_{\max} - 0.75 \frac{P_{\max}}{S} \quad (4)$$

Where  $P_{\max}$  refers to the maximum indentation depth and the extent of elastic recovery is represented by  $0.75(P_{\max}/S)$ .

## References

- 1 J. C. Tan, J. D. Furman and A. K. Cheetham, *J. Am. Chem. Soc.*, 2009, **131**, 14252–4.
- 2 W. Li, M. S. R. N. Kiran, J. L. Manson, J. a Schlueter, a Thirumurugan, U. Ramamurty and A. K. Cheetham, *Chem. Commun.*, 2013, **49**, 4471–3.
- 3 W. C. Oliver and G. M. Pharr, *J. Mater. Res.*, 2004, **19**, 3–20.
- 4 W. C. Oliver and G. M. Pharr, *J. Mater. Res.*, 1992, **7**, 1564–1583.
